# Supplementary material
Source: Royal Society of Chemistry journal article supplement (doi:10.1039/d6cp00716c)
Supplement: d6cp00716c1.pdf [file d6cp00716c1.pdf]

## Supplementary Information

### Mechanism and Pathway of Energy Transfer Between Luminescent Silver Clusters and $Tb^{3+}$ or $Dy^{3+}$ Ions in Silica-Based Glass

L.Yu. Mironov<sup>a,\*</sup>, S.V. Puzyryova<sup>a</sup>, I.E. Kolesnikov<sup>b</sup>

<sup>a</sup>ITMO University, Kronverkskiy pr. 49, Saint Petersburg, 197101, Russia

<sup>b</sup>St. Petersburg University, 7/9 Universitetskaya Nab, Saint Petersburg, 199034, Russia

\*Corresponding author: leonid\_mironov@itmo.ru

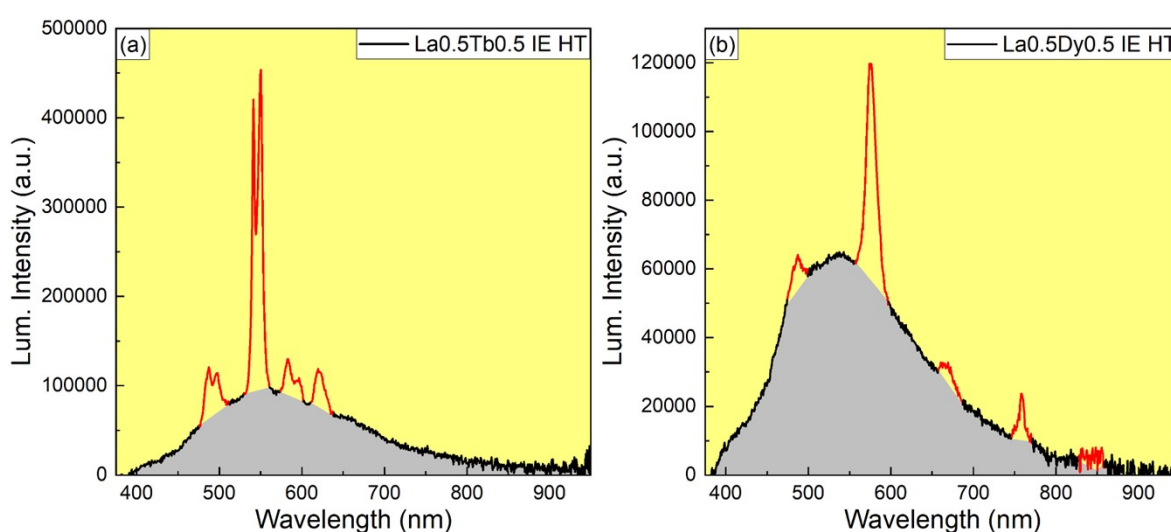

Figure S1. Subtraction of the  $Tb^{3+}$  (a) and  $Dy^{3+}$  (b) luminescence from the total emission of the La0.5Tb0.5 IE HT and La0.5Dy0.5 IE HT samples during the calculation of LSC  $\Phi_{lum}$ .

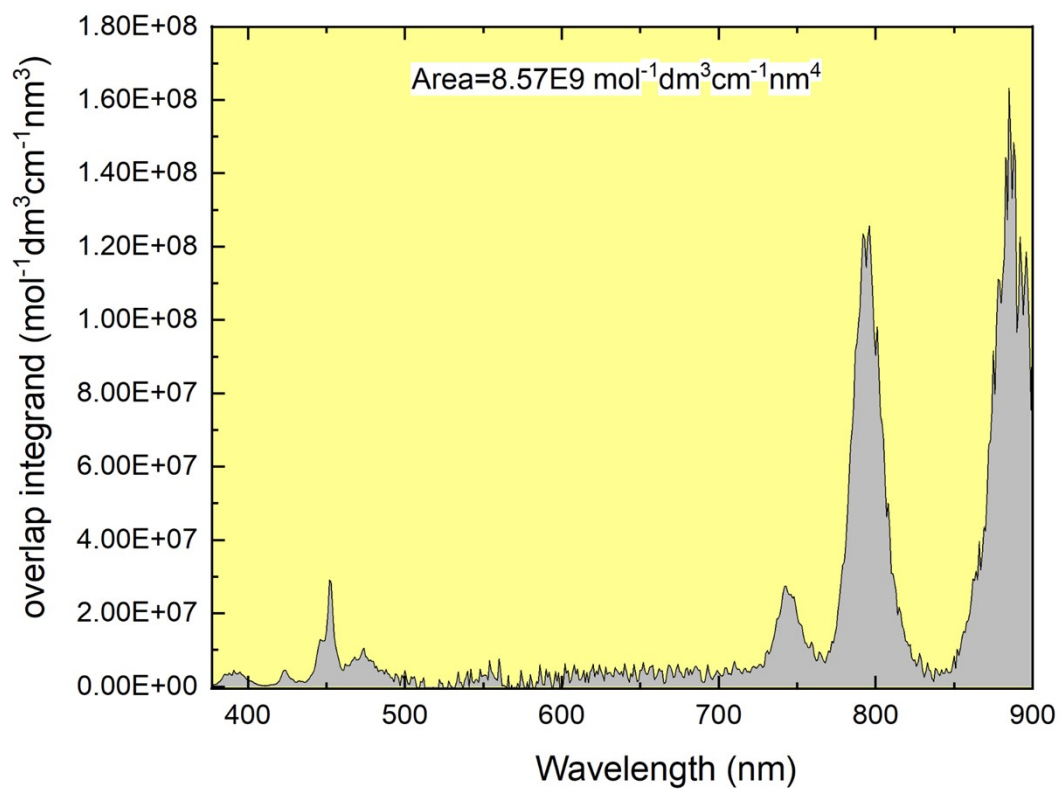

Figure S2. Spectral overlap for the calculation of  $R_0$  for the LSC-Dy<sup>3+</sup> pair.

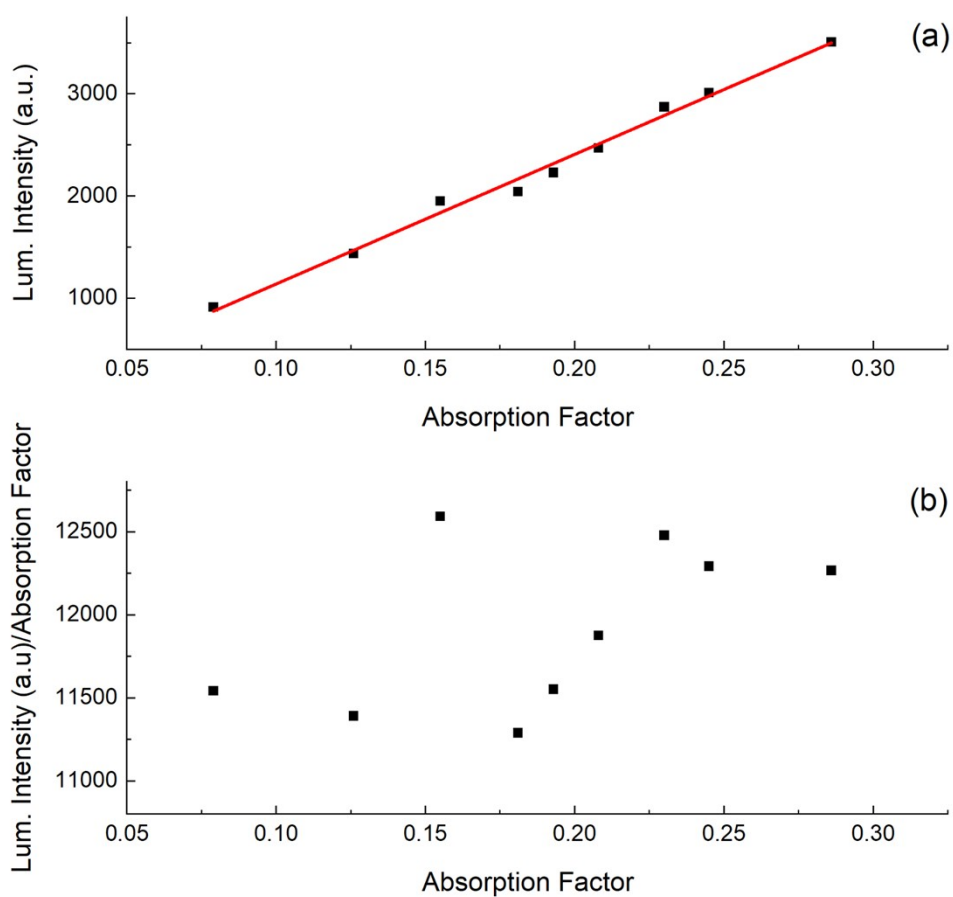

Figure S3. Dependence of the Eu<sup>3+</sup> luminescence intensity at the maximum of the  $^5D_0 \rightarrow ^7F_2$  transition on the sample absorption factor (a). Dependence of the absorption-normalized Eu<sup>3+</sup> luminescence intensity at the maximum of the  $^5D_0 \rightarrow ^7F_2$  transition on the absorption factor (b).
